# Supplementary material
Source: publisher figshare collection journal article supplement (https://frontiersin.figshare.com/ndownloader/files/12810143)
Supplement: Supplementary file [file 12810143]

Table S5: Discriminant Function Analysis, Study 2 – Structure Matrix

|                                                       | Function 1 | Function 2 | Function 3 |
|-------------------------------------------------------|------------|------------|------------|
| Language of preference                                | -.432*     |            |            |
| Frequency of L2 use with friends                      | .353*      |            |            |
| Self-reported proficiency in L2 at time of testing    | .304*      |            |            |
| Frequency of use of L1 with the family                | -.243*     |            |            |
| Native language of friends and acquaintances          | -.216*     |            |            |
| Frequency of L1 use with friends                      | -.187*     |            |            |
| Culture of preference                                 | -.169*     |            |            |
| Length of residence                                   | .166*      |            |            |
| Self-perceived bilingual balance                      | -.128*     |            |            |
| Language of friends                                   | -.110*     |            |            |
| Self-reported proficiency in L1 at time of testing    |            | .326*      |            |
| Level of education                                    |            | .284*      |            |
| Overall frequency of use of L1                        |            | .242*      |            |
| Frequency of use of L1 media                          |            | .227*      |            |
| Self-perceived change to L1                           |            | .120*      |            |
| Frequency of L1 use at work                           |            |            | .383*      |
| Frequency of L2 use at work                           |            |            | .351*      |
| Importance that children should know L1               |            |            | -.271*     |
| Frequency of contact with L1 speakers in home country |            |            | -.252*     |
| Importance to maintain L1                             |            |            | -.226*     |
| Age at testing                                        |            |            | .117*      |
